# Supplementary material for: Electrochemical simultaneous denitrification and removal of phosphorus from the effluent of a municipal wastewater treatment plant using cheap metal electrodes
Source: Royal Society of Chemistry journal article supplement (doi:10.1039/d0ew00049c), 2020-01-01
Supplement: d0ew00049c1.pdf [file d0ew00049c1.pdf]

Supporting information for

Electrochemical simultaneous denitrification and removing phosphorus  
from the effluent of municipal wastewater treatment plant using cheap  
metal electrodes

Min Guo<sup>†</sup>, Li Feng<sup>†</sup>, Yongze Liu<sup>†</sup>, Liqiu Zhang<sup>†\*</sup>

<sup>†</sup>Beijing Key Laboratory for Source Control Technology of Water Pollution,  
Engineering Research Center for Water Pollution Source Control and Eco-  
remediation, Beijing Forestry University, Beijing 100083, China

Corresponding Authors: Prof. Liqiu Zhang

Phone: 86-010-62336246; zhangliqiu@163.com (Liqiu Zhang).

**Figure S1 Effects of electrolyte types on nitrate reduction performance**

**Figure S2 Effects of electrode spacing on nitrate reduction performance**

**Figure S3 The images of FESEM for precipitate in the electrocoagulation process**

**Text S1 Operating cost of simultaneous denitrification and removing phosphorus**

Figure S1 Effects of electrolyte type on nitrate reduction performance

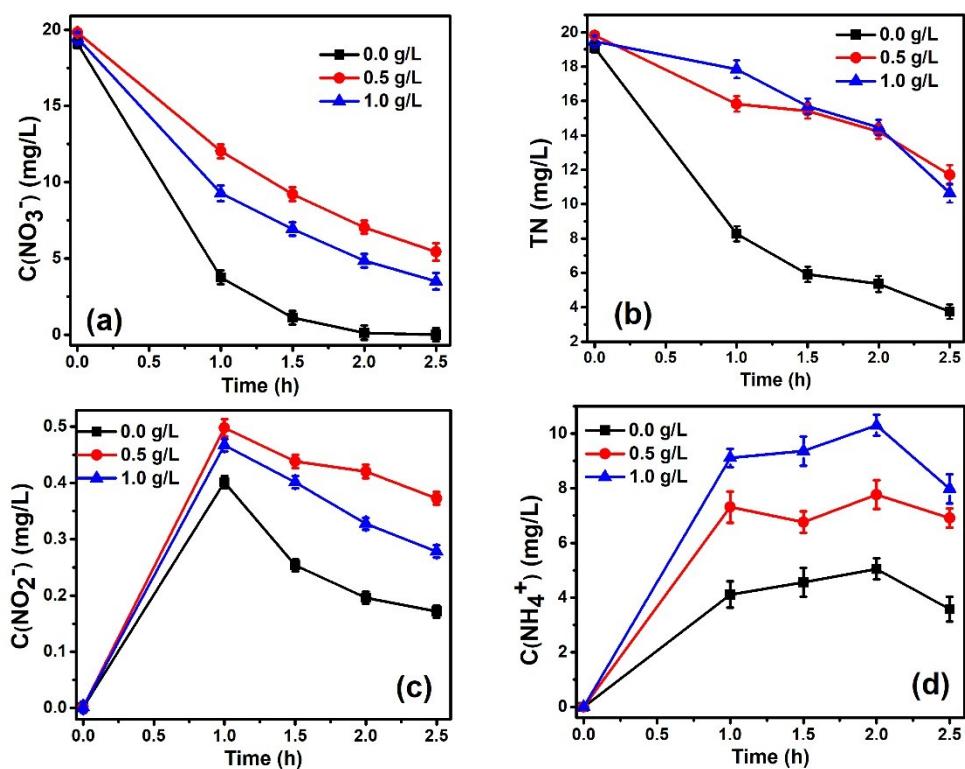

Figure S1(1) Effects of  $\text{Cl}^-$  concentration on the removal of nitrate and the types of products (nitrite and ammonia) by A (Al) – C (Fe).

(Experimental conditions:  $C(\text{NO}_3^-)=20$  mg/L,  $t=2.5$  h)

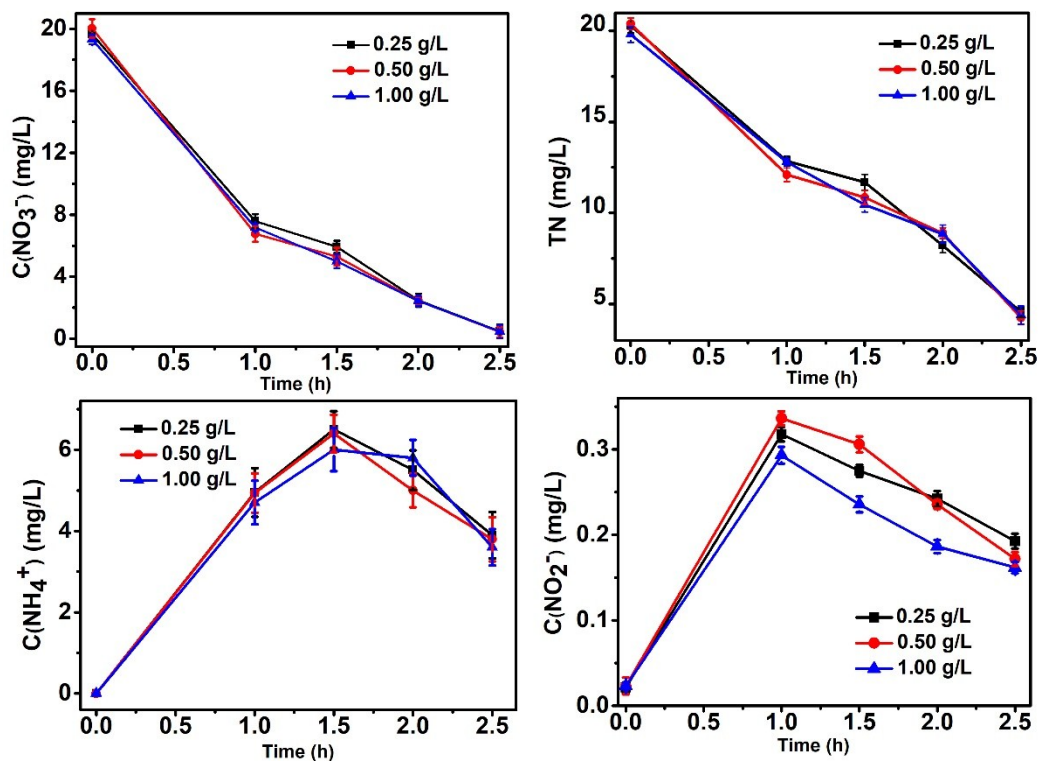

**Figure S1(2) Effects of  $\text{SO}_4^{2-}$  concentration on the removal of nitrate and the types of products (nitrite and ammonia) by A (Al) – C (Fe).**

(Experimental conditions:  $C(\text{NO}_3^-)=20 \text{ mg/L}$ ,  $t=2.5 \text{ h}$ )

**Figure S2 Effects of electrode spacing on nitrate reduction performance**

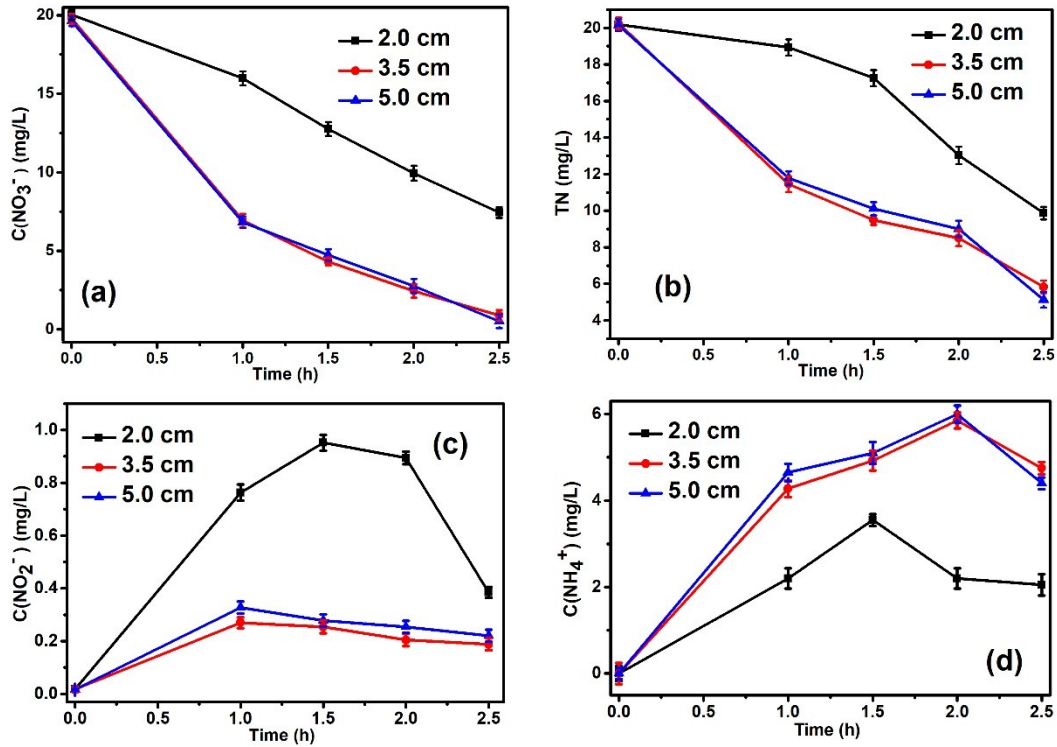

**Figure S2 The effects of electrode spacing on the removal of nitrate and the formation of nitrite, ammonia and nitrogen gas.**

(Experimental conditions:  $C(\text{NO}_3^-)=20 \text{ mg/L}$ ,  $A=1 \text{ mA/cm}^2$ ,  $t=2.5 \text{ h}$ ).

**Figure S3 The images of FESEM for precipitate in the electrocoagulation process**

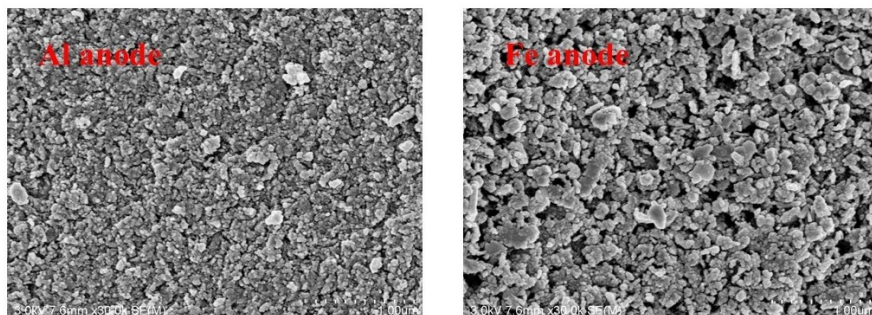

**Figure S3 The images of FESEM for precipitate in the electrocoagulation process**

**Text S1 Operating cost of simultaneous denitrification and removing phosphorus**

The cell voltage between Al electrodes was measured to be 4.8 V when the current density was 8 mA/cm<sup>2</sup>. According to the conclusions obtained in 3.5, it was calculated through equation (18) and equation (19) that the energy consumption of removing nitrogen and phosphorus removal by electrolysis of actual wastewater at 8 mA/cm<sup>2</sup> with aluminum electrodes in 1.5 h was 0.54 KWh/m<sup>3</sup> and the electrode consumption was 0.105 g/ m<sup>3</sup>. According to equation (18), the electricity consumption of electrocatalytic reaction is inversely proportional to the volume of waste water. In the experiment, only 400mL of wastewater could be discharged in the self-made electrolyzer, so the calculated power consumption is relatively high. It is inferred that if the volume of wastewater increased, the power consumption will be reduced.
